# Supplementary material for: Human papillomavirus vaccination in the European Union/European Economic Area and globally: a moral dilemma
Source: PubMed Central journal article supplement (PMC8728487; doi:10.2807/1560-7917.es.2021.26.50.2001659), 2021-12-16
Supplement: 20-01659_COLZANI_SUPPLEMENT.pdf [file 20-01659_COLZANI_SUPPLEMENT.pdf]

This supplementary material is hosted by *Eurosurveillance* as supporting information alongside the article “Human papillomavirus vaccination in the European Union/European Economic Area and globally: a moral dilemma” on behalf of the authors who remain responsible for the accuracy and appropriateness of the content. The same standards for ethics, copyright, attributions and permissions as for the article apply. Supplements are not edited by Eurosurveillance and the journal is not responsible for the maintenance of any links or email addresses provided therein

**TABLE.** Main characteristics of studies on cost-effectiveness analysis of universal human papillomavirus vaccination, 2004–2017 (n = 21)

| Author                  | Publication year | Country     | Currency | Analysis year | Horizon (years) | Perspective | Vaccine used         | Vaccine schedule    | Health outcome unit | CEA threshold defined |
|-------------------------|------------------|-------------|----------|---------------|-----------------|-------------|----------------------|---------------------|---------------------|-----------------------|
| Taira et al. [19]       | 2004             | US          | USD      | 2001          | 38              | TPP         | 2-valent             | Three doses         | QALYg               | 50,000–100,000        |
| Elbasha et al. [15]     | 2007             | US          | USD      | 2005          | 100             | TPP         | 4-valent recombinant | Three doses         | QALYg               | No                    |
| Kulasingam et al. [8]   | 2007             | Australia   | AUD      | 2005          | 73              | TPP         | Bivalent             | Three doses         | QALYg               | No                    |
| Jit et al. [12]         | 2008             | UK          | GBP      | 2006          | 100             | TPP         | 4-valent recombinant | Three doses         | QALYg               | 30,000                |
| Kim et al. [20]         | 2009             | US          | USD      | 2006          | 100             | SP          | 4-valent recombinant | Three doses         | QALYg               | 50,000                |
| Zechmeister et al. [13] | 2009             | Austria     | EUR      | 2007          | 52 and 80       | TPP and SP  | Bivalent             | Three doses         | LYg                 | No                    |
| Olsen et al. [10]       | 2010             | Denmark     | EUR      | 2007          | 62              | TPP         | 4-valent recombinant | Three doses         | QALYg               | No                    |
| Elbasha et al. [14]     | 2010             | US          | USD      | 2008          | 100             | TPP         | 4-valent recombinant | Three doses         | QALYg               | 50,000–100,000        |
| Chesson et al. [16]     | 2011             | US          | USD      | 2008          | 100             | SP          | 4-valent recombinant | Three doses         | QALYg               | 100,000               |
| Burger et al. [18]      | 2014             | Norway      | USD      | 2010          | 100             | SP          | 4-valent recombinant | Three and two doses | QALYg               | 83,000                |
| Laprise et al. [9]      | 2014             | Canada      | CAD      | 2010          | 70              | TPP         | 4-valent recombinant | Three and two doses | QALYg               | 40,000                |
| Pearson et al. [11]     | 2014             | New Zealand | NZD      | 2011          | 98              | TPP         | 4-valent recombinant | Three doses         | QALYg               | 45,000                |
| Bresse et al. [1]       | 2014             | Austria     | EUR      | 2012          | 100             | TPP         | 4-valent recombinant | Three doses         | QALYg               | No                    |
| Blakely et al. [2]      | 2014             | New Zealand | NZD      | 2011          | 98              | TPP         | 4-valent recombinant | Three doses         | QALYg               | No                    |
| Haeussler et al. [3]    | 2015             | Italy       | EUR      | 2015          | Long-term       | TPP         | 4-valent recombinant | Three doses         | QALYg               | 25,000–40,000         |
| Jiménez et              | 2015             | Norway      | NOK      | 2014          | 100             | TPP and SP  | 4-valent             | Three doses         | QALYg               | 215,000               |

|                       |      |             |     |      |           |            |                                   |                     |       |               |
|-----------------------|------|-------------|-----|------|-----------|------------|-----------------------------------|---------------------|-------|---------------|
| al. [7]               |      |             |     |      |           |            | recombinant and bivalent          |                     |       |               |
| Olsen et al. [17]     | 2015 | Denmark     | EUR | 2008 | 62 and 40 | TPP        | 4-valent recombinant              | Three and two doses | QALYg | No            |
| Qendri et al. [5]     | 2017 | Netherlands | EUR | 2011 | Lifetime  | TPP        | Bivalent                          | Two doses           | LYsg  | 40,000        |
| Damm et al. [4]       | 2017 | Germany     | EUR | 2010 | 100       | TPP and SP | 4-valent recombinant and bivalent | Three and two doses | QALYg | 50,000        |
| Largerone et al. [21] | 2017 | Germany     | EUR | 2014 | 100       | TPP        | 4-valent recombinant and 9-valent | Two doses           | QALYg | 40,000        |
| Mennini et al. [6]    | 2017 | Italy       | EUR | 2014 | 100       | TPP        | 4-valent recombinant and 9-valent | Two doses           | QALYg | 25,000–40,000 |

## References:

- [1] Bresse X, Goergen C, Prager B, Joura E. Universal vaccination with the quadrivalent HPV vaccine in Austria: impact on virus circulation, public health and cost-effectiveness analysis. *Expert Rev Pharmacoecon Outcomes Res.* 2014;14(2):269-81.
- [2] Blakely T, Kvizhinadze G, Karvonen T, Pearson AL, Smith M, Wilson N. Cost-effectiveness and equity impacts of three HPV vaccination programmes for school-aged girls in New Zealand. *Vaccine.* 2014;32(22):2645-56.
- [3] Haeussler K, Marcellusi A, Mennini FS, Favato G, Picardo M, Garganese G, et al. Cost-Effectiveness Analysis of Universal Human Papillomavirus Vaccination Using a Dynamic Bayesian Methodology: The BEST II Study. *Value Health.* 2015;18(8):956-68.
- [4] Damm O, Horn J, Mikolajczyk RT, Kretzschmar MEE, Kaufmann AM, Delere Y, et al. Cost-effectiveness of human papillomavirus vaccination in Germany. *Cost Eff Resour Alloc.* 2017;15:18.
- [5] Qendri V, Bogaards JA, Berkhof J. Health and Economic Impact of a Tender-Based, Sex-Neutral Human Papillomavirus 16/18 Vaccination Program in the Netherlands. *J Infect Dis.* 2017;216(2):210-9.
- [6] Mennini FS, Bonanni P, Bianic F, de Waure C, Baio G, Plazzotta G, et al. Cost-effectiveness analysis of the nine-valent HPV vaccine in Italy. *Cost Eff Resour Alloc.* 2017;15:11.
- [7] Jimenez E, et al. Cost-Effectiveness of HPV-Vaccination of Boys Aged 12 in a Norwegian Setting Oslo: Norwegian Centre for the Health Services at The Norwegian Institute of Public Health (NIPH); 2015 [Available from: <http://www.ncbi.nlm.nih.gov/books/NBK390581/>].

- [8] Kulasingam S, Connelly L, Conway E, Hocking JS, Myers E, Regan DG, et al. A cost-effectiveness analysis of adding a human papillomavirus vaccine to the Australian National Cervical Cancer Screening Program. *Sex Health*. 2007;4(3):165-75.
- [9] Laprise JF, Drolet M, Boily MC, Jit M, Sauvageau C, Franco EL, et al. Comparing the cost-effectiveness of two- and threedose schedules of human papillomavirus vaccination: a transmission-dynamic modelling study. *Vaccine*. 2014;32(44):5845-53.
- [10] Olsen J, Jepsen MR. Human papillomavirus transmission and cost-effectiveness of introducing quadrivalent HPV vaccination in Denmark. *Int J Technol Assess Health Care*. 2010;26(2):183-91.
- [11] Pearson AL, Kvizhinadze G, Wilson N, Smith M, Canfell K, Blakely T. Is expanding HPV vaccination programs to include school-aged boys likely to be value-for-money: a cost-utility analysis in a country with an existing school-girl program. *BMC Infect Dis*. 2014;14:351.
- [12] Jit M, Choi YH, Edmunds WJ. Economic evaluation of human papillomavirus vaccination in the United Kingdom. *BMJ*. 2008;337:a769.
- [13] Zechmeister I, Blasio BF, Garnett G, Neilson AR, Siebert U. Cost-effectiveness analysis of human papillomavirus vaccination programs to prevent cervical cancer in Austria. *Vaccine*. 2009;27(37):5133-41.
- [14] Elbasha EH, Dasbach EJ. Impact of vaccinating boys and men against HPV in the United States. *Vaccine*. 2010;28(42):6858-67.
- [15] Elbasha EH, Dasbach EJ, Insinga RP. Model for assessing human papillomavirus vaccination strategies. *Emerg Infect Dis*. 2007;13(1):28-41.
- [16] Chesson HW, Ekwueme DU, Saraiya M, Dunne EF, Markowitz LE. The cost-effectiveness of male HPV vaccination in the United States. *Vaccine*. 2011;29(46):8443-50.
- [17] Olsen J, Jorgensen TR. Revisiting the cost-effectiveness of universal HPV-vaccination in Denmark accounting for all potentially vaccine preventable HPV-related diseases in males and females. *Cost Eff Resour Alloc*. 2015;13:4.
- [18] Burger EA, Sy S, Nygard M, Kristiansen IS, Kim JJ. Prevention of HPV-related cancers in Norway: cost-effectiveness of expanding the HPV vaccination program to include pre-adolescent boys. *PLoS One*. 2014;9(3):e89974.
- [19] Taira AV, Neukermans CP, Sanders GD. Evaluating human papillomavirus vaccination programs. *Emerg Infect Dis*. 2004;10(11):1915-23.
- [20] Kim JJ, Goldie SJ. Cost effectiveness analysis of including boys in a human papillomavirus vaccination programme in the United States. *BMJ*. 2009;339:b3884.
- [21] Llargeron N, Petry KU, Jacob J, Bianic F, Anger D, Uhart M. An estimate of the public health impact and cost-effectiveness of universal vaccination with a 9-valent HPV vaccine in Germany. *Expert Rev Pharmacoecon Outcomes Res*. 2017 Feb;17(1):85-98.
